# Supplementary material for: Ribo-seq enlightens codon usage bias
Source: PubMed Central journal article supplement (PMC5499818; doi:10.1093/dnares/dsw062), 2017-02-07
Supplement: dsw062_Supp.pdf [file dsw062_Supp.pdf]

# Ribo-seq enlightens Codon Usage Bias

## Supplementary material

A.

|             | Shrap | This study |
|-------------|-------|------------|
| C. elegans  | 178   | 181        |
| C. albicans | 28    | 113        |

B.

| Organism        | Sample       | Experiment |
|-----------------|--------------|------------|
| M. musculus     | SAMN03098049 | SRR1605293 |
| H. sapiens      | SAMN00990790 | SRR493747  |
| D. melanogaster | SAMN02264622 | SRR942868  |
| H. capsulatum   | SAMN03649616 | SRR2015214 |
| P. falciparum   | SAMN02850772 | SRR1378560 |
| R. norvegicus   | SAMN03008628 | SRR1557705 |
| C. elegans      | SAMN01090422 | SRR522871  |
|                 |              | SRR522872  |
| S. pombe        | SAMEA2292866 | ERR392085  |
| C. albicans     | SAMN02400884 | SRR1027795 |
| S. cerevisiae   | SAMN00002142 | SRR014378  |

Table 1.

A. Number of genes used in highly expressed genes in Sharp and this study.

B. Species and Ribo-seq samples used in this study.

MUS\_SRR1605293\_S20-E200

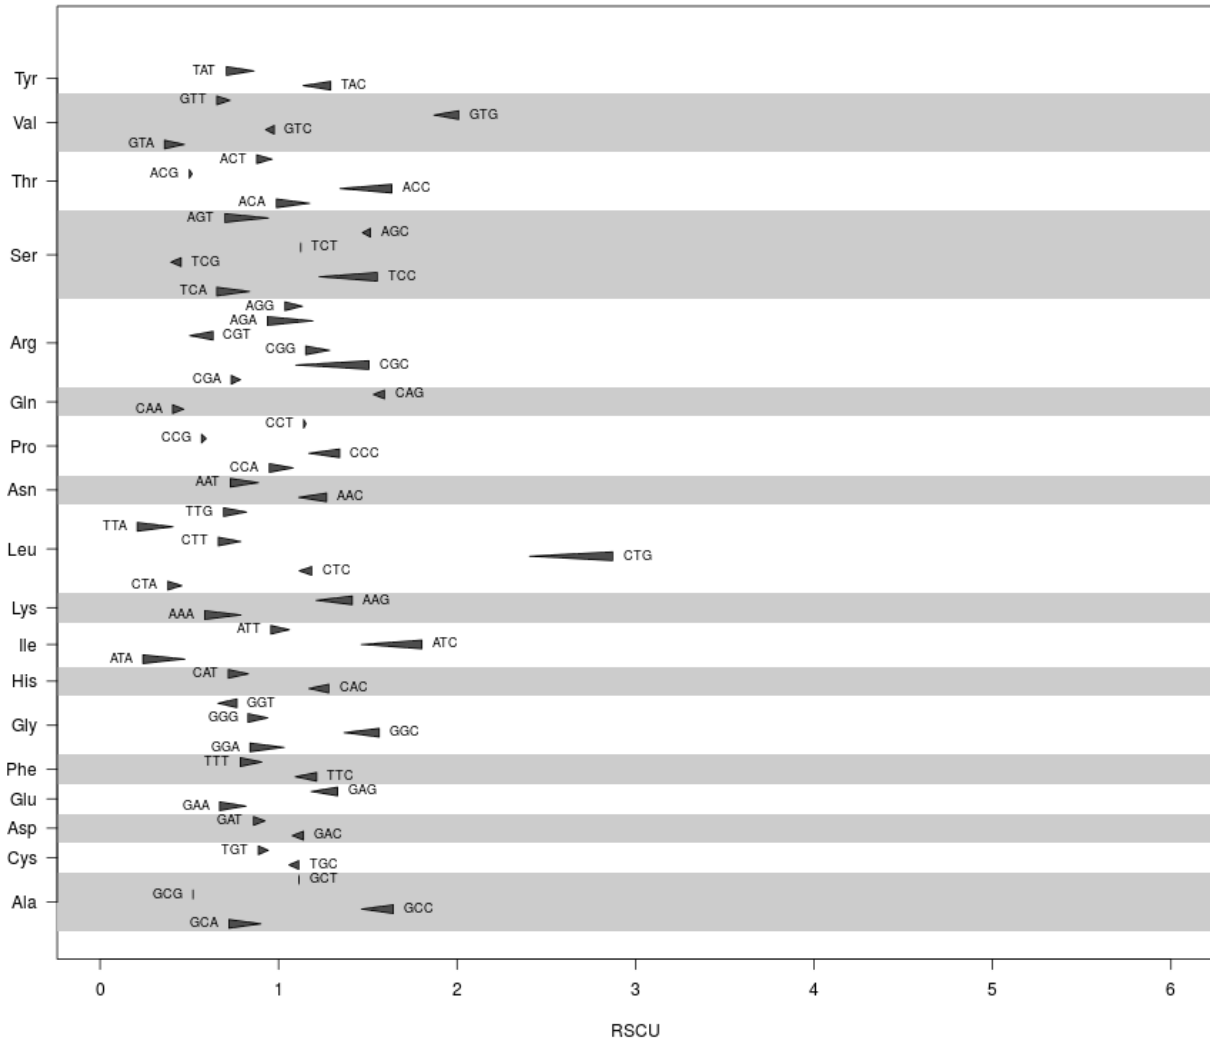

Figure 1. RSCU<sub>RS</sub> in *M. musculus*. Large borders of triangles represent RSCU<sub>RS</sub> in highly expressed genes, and peaks represent RSCU<sub>RS</sub> in lowly expressed genes.

ALBICANS\_SRR1027795\_S20-E200

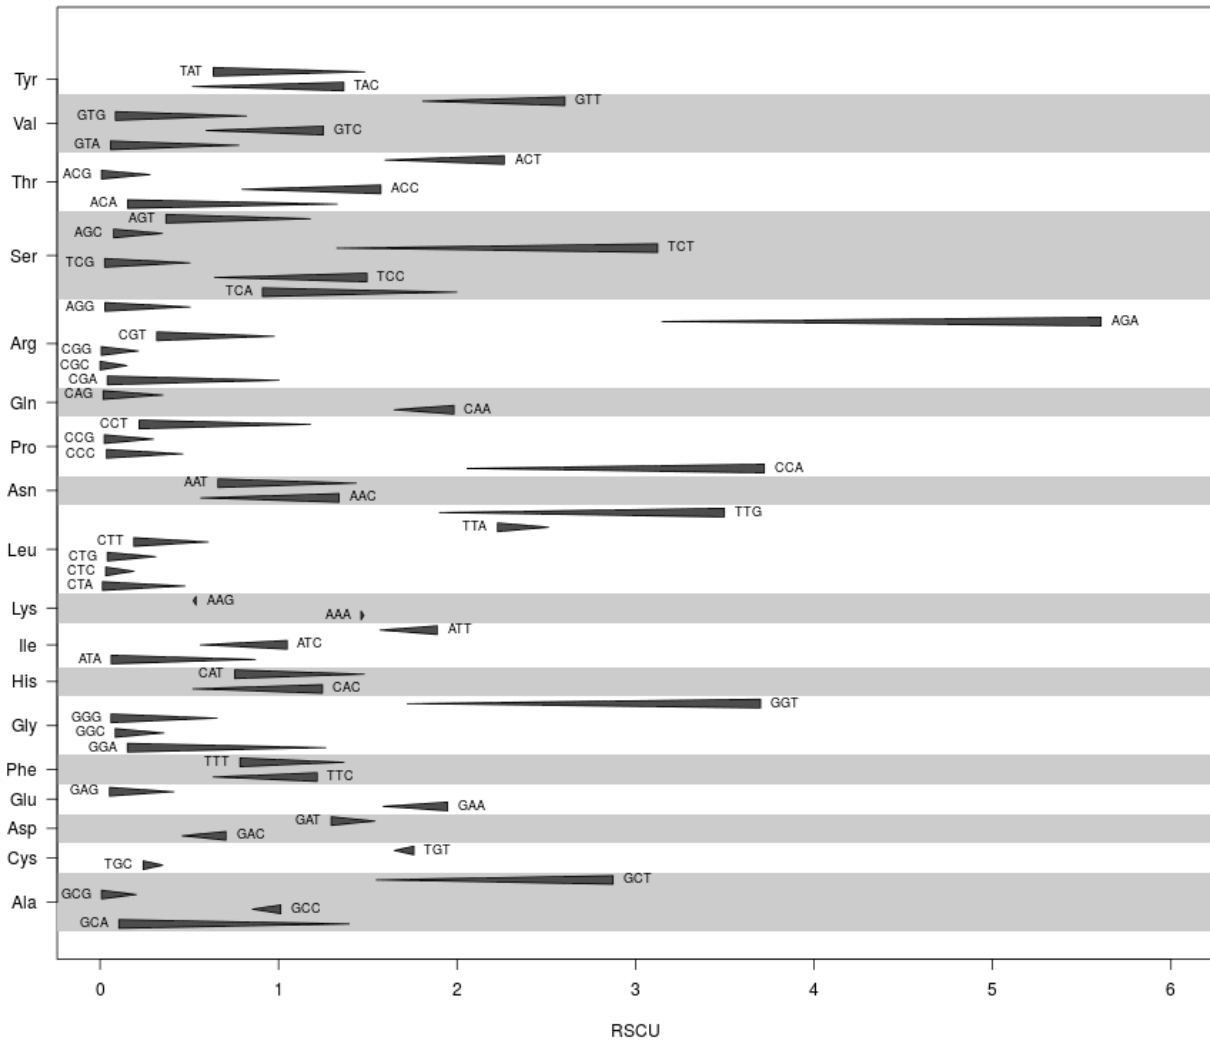

Figure 2. RSCU<sub>RS</sub> in *C. albicans*. Large borders of triangles represent RSCU<sub>RS</sub> in highly expressed genes, and peaks represent RSCU<sub>RS</sub> in lowly expressed genes.

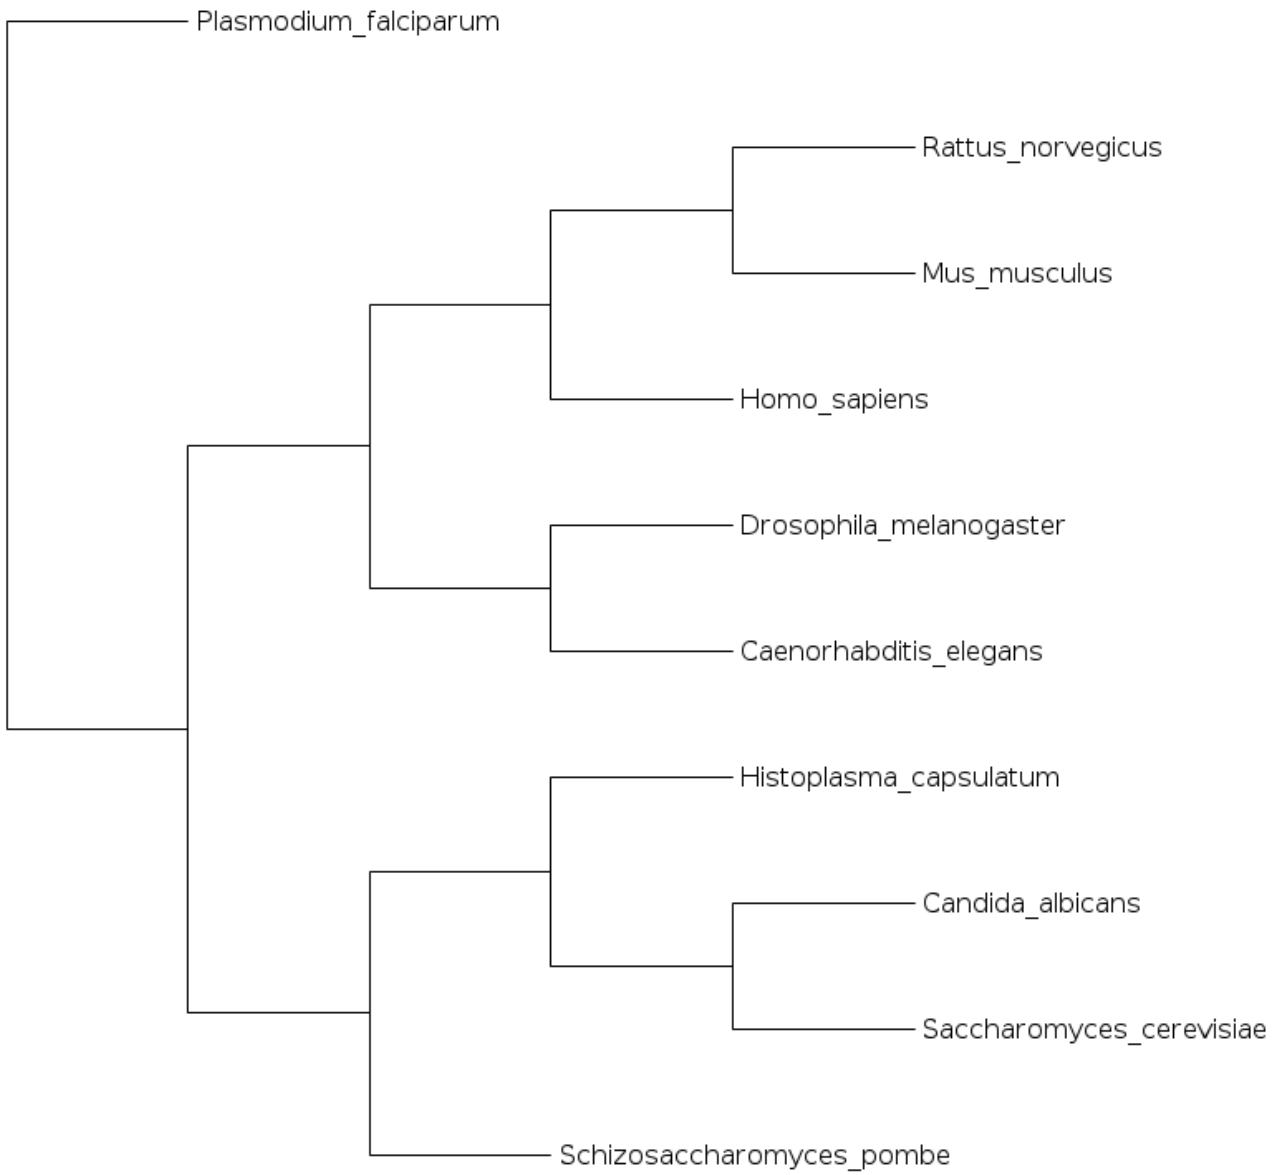

Figure 3. Species tree taken from the NCBI taxonomy.
